# Supplementary material for: Disease-related knowledge measurement instruments of people affected by multiple sclerosis: protocol for a systematic psychometric review
Source: HighWire-hosted journal article supplement (doi:10.1136/bmjopen-2021-049580), 2021-10-01
Supplement: bmjopen-2021-049580supp001_data_supplement.pdf [file bmjopen-2021-049580supp001_data_supplement.pdf]

Supplementary file 1. Description for the search strategy built for MEDLINE (via PubMed)

1. "Knowledge"[Mesh] OR "Patient Medication Knowledge"[Mesh] OR "Health Knowledge, Attitudes, Practice"[Mesh] OR "Knowledge of Results (Psychology)"[Mesh]
2. knowledge\*
3. #1 OR #2
4. "Multiple Sclerosis"[Mesh]
5. "multiple sclerosis"
6. #4 OR #5
7. Filter for psychometric properties developed and validated by Terwee et al. 2009
8. #3 AND #6 AND #7

Terwee CB, Jansma EP, Riphagen II, de Vet HC. Development of a methodological PubMed search filter for finding studies on measurement properties of measurement instruments. *Qual Life Res.* 2009;18(8):1115-23. doi: 10.1007/s11136-009-9528-5.
